# Supplementary material for: Colorimetric Detection of the SARS-CoV-2 Virus (COVID-19) in Artificial Saliva Using Polydiacetylene Paper Strips
Source: MDPI journal article supplement (doi:10.3390/bios12100804), 2022-09-29
Supplement: s1 [file s1]

Supplementary Materials

# Colorimetric Detection of the SARS-CoV-2 Virus (COVID-19) in Artificial Saliva Using Polydiacetylene Paper Strips

Christopher D. Prainito <sup>1</sup>, Gaddi Eshun <sup>2</sup>, Francis J. Osonga <sup>2</sup>, Daniel Isika <sup>2</sup>, Cynthia Centeno <sup>2</sup>, and Omowunmi A. Sadik <sup>2,\*</sup>

<sup>1</sup> Current address: Harvard University, 29 Oxford Street, Cambridge, MA 02138, USA

<sup>2</sup> Chemistry and Environmental Science Department, New Jersey Institute of Technology, University Heights, Newark, NJ 07102, USA

\* Correspondence: sadik@njit.edu

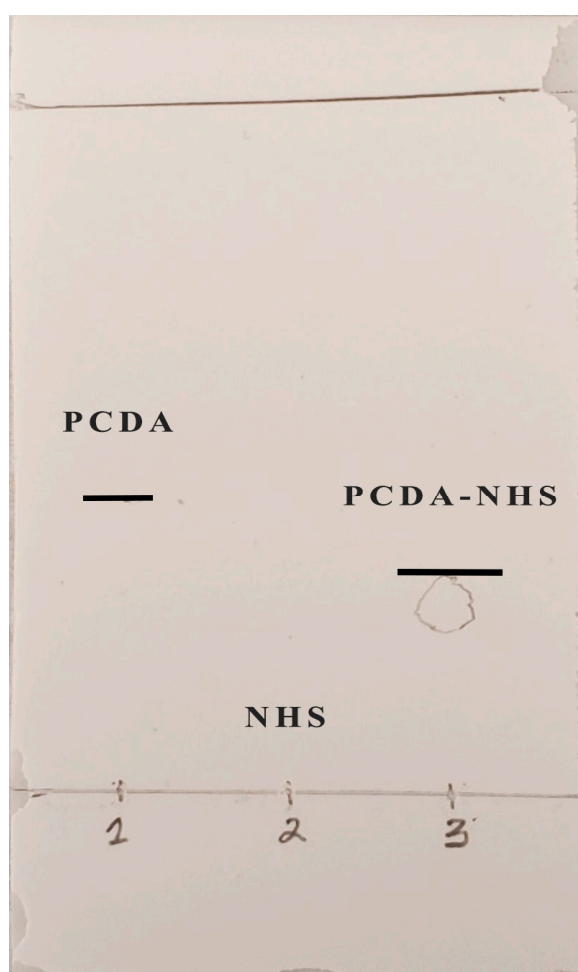

**Figure S1.** Thin-Layer Chromatography of PCDA, NHS, and PCDA-NHS. The distances traveled by the PCDA and PCDA-NHS samples are indicated by horizontal lines. The NHS sample was not shown to be UV-active. PCDA exhibited an  $R_f$  value of 0.42 and PCDA-NHS exhibited an  $R_f$  value of 0.30. The different distances traveled by PCDA and PCDA-NHS result from their different polarities and indicate that the reaction was completed.
